# Supplementary material
Source: PubMed Central journal article supplement (PMC5448830)
Supplement: BLT-15-239_Suppl_content.pdf [file BLT-15-239_Suppl_content.pdf]

## Online Supplementary Content

### Donors' characteristics

Table SI - Donors' characteristics.

| Sample | Blood type | Sex    | Age of donor, years |
|--------|------------|--------|---------------------|
| EC 1   | O+         | Female | 58                  |
| EC 2   | O-         | Female | 43                  |
| EC 3   | A+         | Male   | 50                  |
| EC 4   | O+         | Male   | 49                  |
| EC 5   | O+         | Male   | 33                  |

### Composition of HEPA buffer

HEPA 10 mM glucose was prepared at the beginning of the follow up and stored at 4 °C. It was filtrated at 0.22 µm before use. It is composed of: NaCl 130 mM, KCl 5.4 mM, CaCl<sub>2</sub>·2H<sub>2</sub>O 1 mM, MgCl<sub>2</sub>·6H<sub>2</sub>O 0.5 mM, glucose 10 mM, Hepes 15 mM, BSA 1 mg/mL. pH was adjusted at 7.4 with NaOH or HCl, theoretical osmolarity is approximately 298 mOsm. Chemicals came from MSD Merck Sharp & Dohme, Luzern, Switzerland, and Sigma-Aldrich, Steinheim, Germany.

### Details on cell membrane fluctuations measurements

Fluctuations rate can be measured using Equation (1).

$$\text{Var}(\varphi_{\text{cell}} + \varphi_{\text{background}}) = \text{Var}(\varphi_{\text{cell}}) + \text{Var}(\varphi_{\text{background}}) + 2\text{Cov}(\varphi_{\text{cell}} + \varphi_{\text{background}}) \quad (1)$$

The temporal deviation of each pixel at (i, j)<sup>th</sup> position can be measured using Equation (2):

$$\text{std}(\varphi_{\text{cell}})_{(i,j)} = \sqrt{[\text{std}(\varphi_{\text{cell}} + \varphi_{\text{background}})_{(i,j)}]^2 - [\text{std}(\varphi_{\text{background}})]^2} \quad (2)$$

Eventually, the CMF is measured with Equation (3):

$$\text{CMF}_{\text{OPD}}(\text{nm})_{(i,j)} = \text{std}(\varphi_{\text{cell}})_{(i,j)} \quad (3)$$

in which  $\text{Var}(\varphi_{\text{cell}})$  and  $\text{Var}(\varphi_{\text{background}})$  are the temporal variance in OPD corresponding to the CMF and to the background fluctuations, respectively, and  $\text{Cov}(\varphi_{\text{cell}}, \varphi_{\text{background}})$  is the covariance of the two variables. Assuming that the two variables are independent,  $\text{Cov}(\varphi_{\text{cell}}, \varphi_{\text{background}}) = 0$ .

All the simulations were implemented in Matlab 2015.

### Time course changes in intracellular oxidised glutathione

Intracellular GSSG concentration is presented in Figure S1.

### Correlation between population and single-cell analyses with digital holographic microscope

The correlation between red blood cell (RBC) morphology (based on CPA) and the SD-OPD value demonstrated that SD-OPD was linearly correlated to the percentage of spherocytes (positively,  $R^2=0.98$ ) and discocytes (negatively,  $R^2=0.98$ ) in the sample (see Figure S2), but not to the percentage of stomatocytes and echinocytes.

### Single-cell morphology analysis (CellProfiler and CPA) for each individual erythrocyte concentrate

Results of single-cell morphology analysis (CellProfiler and CPA) are presented for each individual EC in Figure S3.

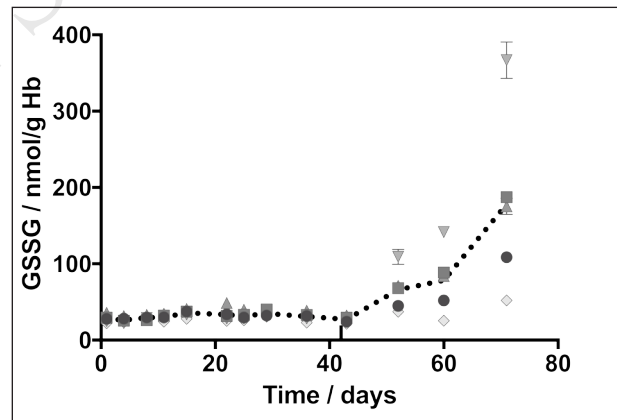

Figure S1 - Intracellular GSSG concentration for ECs 1-5 stored during 71 days.

Individual (symbols) and mean values (dotted line) are presented  $\pm$  standard deviation. GSSG: oxidised glutathione.

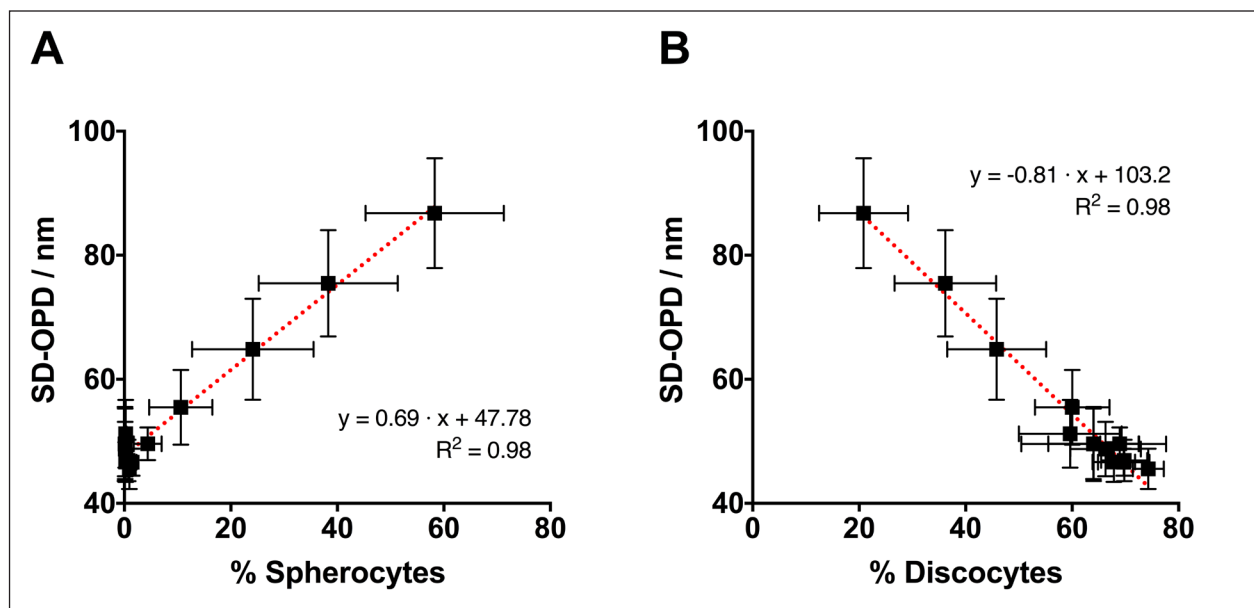

**Figure S2** - Correlation between SD-OPD (nm) and percentage of spherocytes (A) and discocytes (B) in the sample obtained with CellProfiler analysis at each time point, mean values are presented  $\pm$  standard deviation.

DHM images of RBCs were acquired weekly over 71 days at a  $20\times$  magnification. The equation of linear correlation curve (dotted line) and regression coefficient  $R^2$  are specified. SD-OPD: standard deviation of the optical path difference distribution; DHM: digital holographic microscope; RBC: red blood cell.

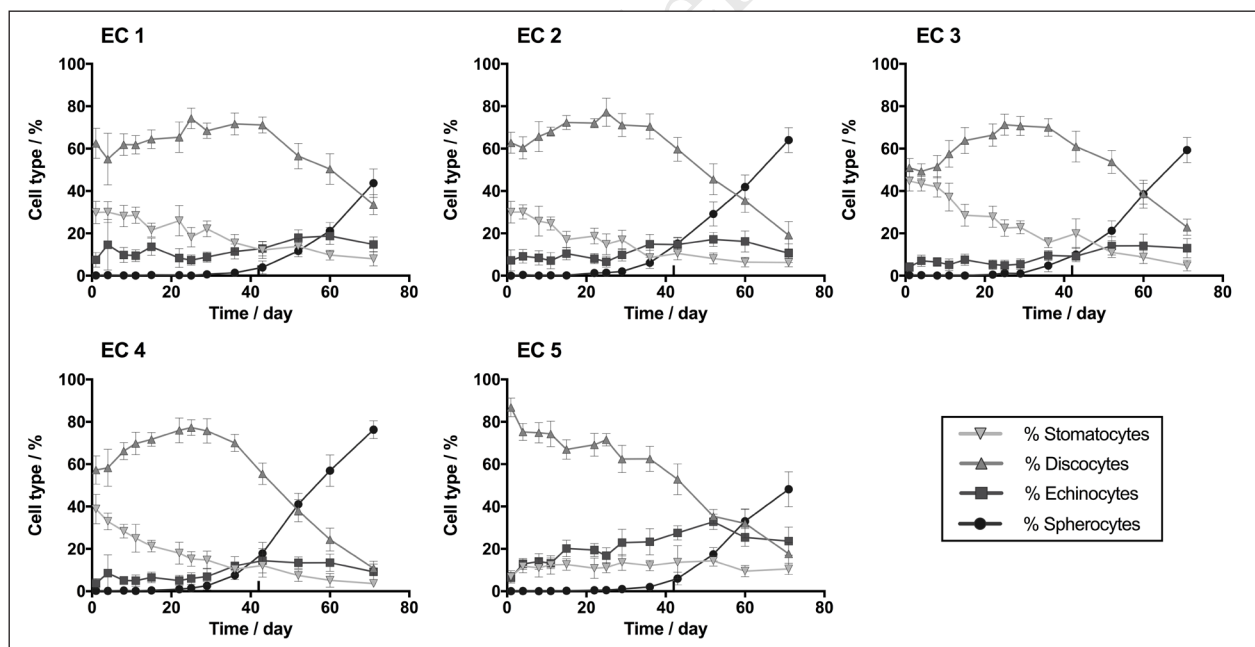

**Figure S3** - DHM analysis of single-cell (CellProfiler and CPA) morphology of RBCs for ECs 1-5 stored during 71 days.

Twelve images (3 wells per EC and 4 images per well) and 3 movies (1 per well) were acquired for each EC. Mean values are presented  $\pm$  standard deviation. CPA: CellProfiler Analyst; RBC: red blood cell; EC: erythrocyte concentrate.
